# Supplementary material
Source: PubMed Central journal article supplement (PMC3486364)
Supplement: JB.01215-12_zjb999092038so1.pdf [file JB.01215-12_zjb999092038so1.pdf]

# SUPPLEMENTAL MATERIAL

## Figure S1

**A**

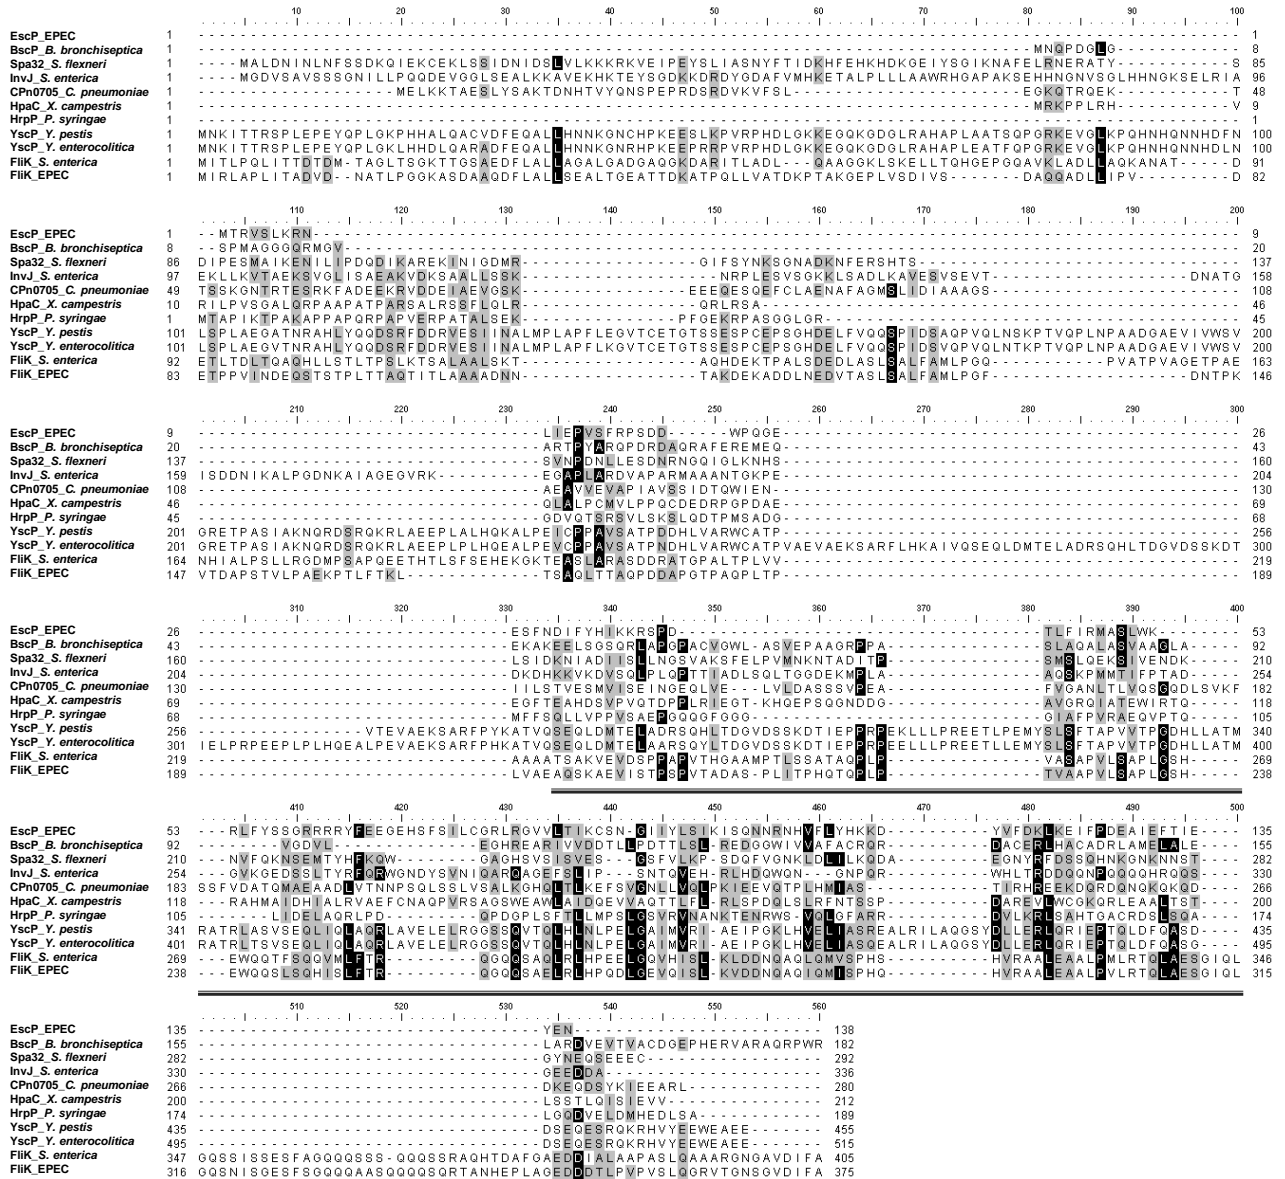

**B**

| Protein                | Identity/Similarity (%) | Protein                | Identity/Similarity (%) |
|------------------------|-------------------------|------------------------|-------------------------|
| BscP_B. bronchiseptica | 14 / 32                 | HrpP_P. syringae       | 12 / 28                 |
| Spa32_S. flexneri      | 9 / 32                  | YscP_Y. pestis         | 13 / 27                 |
| InvJ_S. enterica       | 10 / 21                 | YscP_Y. enterocolitica | 12 / 25                 |
| CPn0705_C. pneumoniae  | 12 / 26                 | FliK_S. enterica       | 16 / 35                 |
| HpaC_X. campestris     | 10 / 28                 | FliK_EPEC              | 12 / 30                 |

**FIG S1** (A) Multiple sequence alignment of EscP and members of the YscP/FliK family of proteins. Protein sequence alignment was performed using MUSCLE. Residues were shaded using BioEdit (<http://www.mbio.ncsu.edu/BioEdit/bioedit.html>), when having a consensus greater than 40%; identical residues are shown with a black background and conserved residues with a grey background. The most conserved C-terminal region is underlined. (B) Identity and similarity percentages of paired sequence alignments (Stretcher) between full-length EscP and the conserved C-terminal region (underlined in A) of BscP (NP\_888175) from *Bordetella bronchiseptica*, Spa32 (NP\_085314) from *Shigella flexneri*, InvJ (NP\_461813) from *Salmonella enterica*, CPn0705 (NP\_224901) from *Chlamydophila pneumonia*, HpaC (YP\_362155) from *Xanthomonas campestris pv. vesicatoria*, HrpP (NP\_791225) from *Pseudomonas syringae pv. tomato*, YscP (NP\_395176) from *Yersinia pestis*, YscP (AAF70341) from *Yersinia enterocolitica*, FliK (NP\_460927) from *Salmonella enterica*, and FliK (YP\_002329574) from EPEC.

**Figure S2**

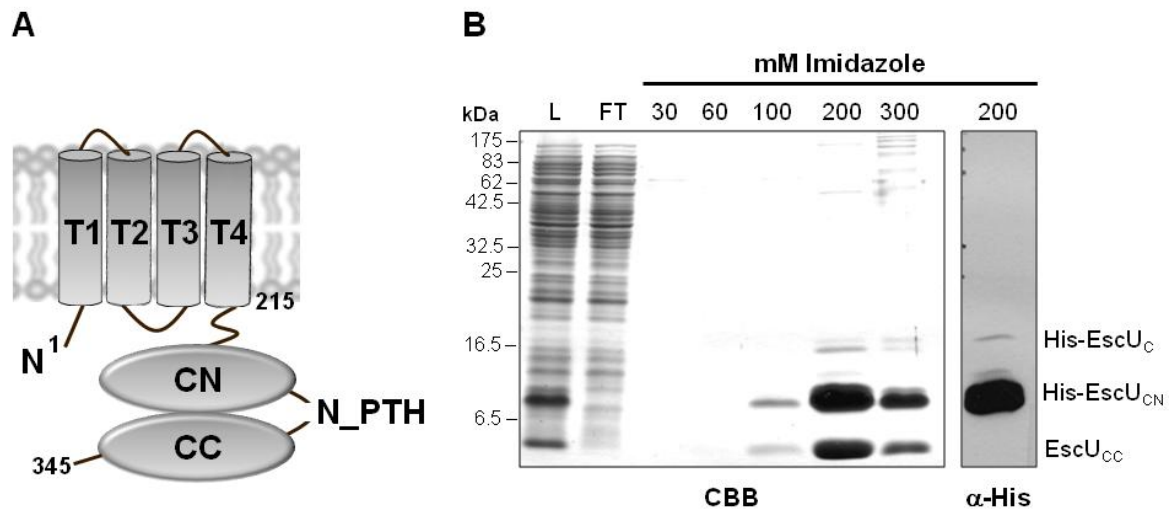

**FIG S2** (A) Schematic representation of EscU. EscU has four transmembrane helices (T1 to T4) in its N-terminal domain (residues 1 to 214), followed by a C-terminus cytoplasmic domain (EscU<sub>C</sub>, residues 215 to 345). The EscU<sub>C</sub> domain is auto-cleaved within a conserved NPTH sequence (between N262 and P263). N\_PTH, cleaved NPTH domain. (B) Purification and auto-cleavage of His-EscU<sub>C</sub> by nickel affinity chromatography. The cleared lysate (L) from cells overproducing His-EscU<sub>C</sub> was loaded onto Ni-NTA agarose resin and purification was performed as described in Materials and Methods. Flow-through (FT); washes with 30 and 60 mM imidazole, and elutions with 100, 200 and 300 mM imidazole. All fractions were analyzed by CBB stained SDS-15% PAGE. A small amount of His-EscU<sub>C</sub> and increased amounts of its auto-cleavage products, His-EscU<sub>CN</sub> and EscU<sub>CC</sub>, were detected. The EscU<sub>CC</sub> sub-domain co-purified with His-EscU<sub>CN</sub>. The 200 mM elution fraction was immunoblotted with anti-His antibody (right panel). Molecular masses of protein standards are indicated on the left of the gel.

**Figure S3**

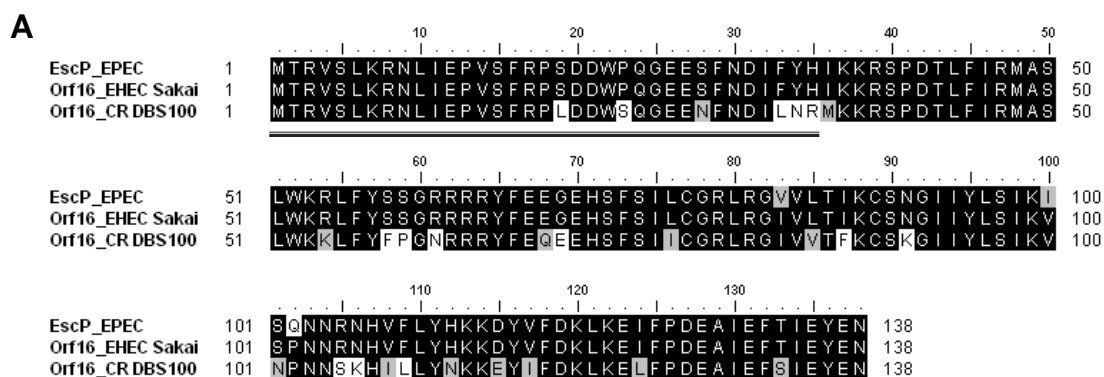

**B**

| Protein    | Identity/Similarity (%) |
|------------|-------------------------|
| Orf16 EHEC | 97 / 99                 |
| Orf16 CR   | 78 / 89                 |

**FIG S3** (A) Multiple sequence alignment of EPEC EscP and homolog proteins from the related A/E pathogens EHEC and CR. Protein sequence alignment was performed using MUSCLE. Residues were shaded using BioEdit (<http://www.mbio.ncsu.edu/BioEdit/bioedit.html>), when having a consensus greater than 40%; identical residues are shown with a black background and conserved residues with a grey background. The 35 amino acid residues that are missing in the Orf16 protein from *C. rodentium* are underlined. (B) Identity and similarity percentages of paired sequence alignments (Stretcher) between EPEC EscP/Orf16 (AAC38385), Orf16 from EHEC (NP\_312593) and Orf16 from CR (AAL06371) completed with the missing amino acid residues.
